# Supplementary material for: In Vitro Cytotoxic and Antiproliferative Activity of Cydonia oblonga flower petals, leaf and fruit pellet ethanolic extracts. Docking simulation of the active flavonoids on anti-apoptotic protein Bcl-2
Source: publisher site journal article supplement (doi:10.1515/chem-2018-0062), 2018-07-09
Supplement: Supplementary file 1 [file chem-2018-0062_sm.pdf]

# Supplementary Information

# Open Access

Lucia Pirvu\*, Amalia Stefaniu, Georgeta Neagu, Bujor Albu, Lucia Pintilie

## *In Vitro* Cytotoxic and Antiproliferative Activity of *Cydonia oblonga* flower petals, leaf and fruit pellet ethanolic extracts. Docking simulation of the active flavonoids on anti-apoptotic protein Bcl-2

**Table 15:** The effects of *Cydonia oblonga* extracts (Col40, Cop40 and Cpf40) and corresponding dilution series (5, 10, 25, 50 and 100 µg GAE / mL) on the viability of the four cell lines (L-929, and BT-20, HepG2 and Caco-2).

| Cell lines /<br>Tested extract                                                 | Percent of cell proliferation and, respectively, percent of cell inhibition face to control samples, relative ratio ± SD(%), and the deviation from the linearity ( $R^2$ ) |                               |                               |                               |                                |        |
|--------------------------------------------------------------------------------|-----------------------------------------------------------------------------------------------------------------------------------------------------------------------------|-------------------------------|-------------------------------|-------------------------------|--------------------------------|--------|
|                                                                                | 5 µg GAE / mL<br>test sample                                                                                                                                                | 10 µg GAE / mL<br>test sample | 25 µg GAE / mL<br>test sample | 50 µg GAE / mL<br>test sample | 100 µg GAE / mL<br>test sample | $R^2$  |
| <b>Cell proliferation results - test vegetal samples vs. negative controls</b> |                                                                                                                                                                             |                               |                               |                               |                                |        |
| Murine fibroblasts cell line (L-929)                                           |                                                                                                                                                                             |                               |                               |                               |                                |        |
| FCol40                                                                         | 0 ± 0.06                                                                                                                                                                    | 1 ± 0.38                      | 16 ± 0.70                     | 30 ± 0.72                     | 52 ± 0.78                      | 0.9728 |
| FCop40                                                                         | 0 ± 0.00                                                                                                                                                                    | 2 ± 0.71                      | 7 ± 0.47                      | 16 ± 0.50                     | 29 ± 0.45                      | 0.9936 |
| FCof40                                                                         | 0 ± 0.11                                                                                                                                                                    | 3 ± 0.96                      | 15 ± 1.01                     | 24 ± 0.80                     | 54 ± 0.80                      | 0.9910 |
| <b>Cell inhibition results - test vegetal samples vs. positive controls</b>    |                                                                                                                                                                             |                               |                               |                               |                                |        |
| Human mammary/breast cancer cell line (BT-20)                                  |                                                                                                                                                                             |                               |                               |                               |                                |        |
| MCol40                                                                         | 0 ± 0.57                                                                                                                                                                    | 4 ± 0.60                      | 16 ± 0.95                     | 30 ± 1.23                     | 54 ± 2.37                      | 0.9906 |
| MCop40                                                                         | 0 ± 0.10                                                                                                                                                                    | 2 ± 0.30                      | 5 ± 1.35                      | 10 ± 1.11                     | 19 ± 0.35                      | 0.9992 |
| MCo40                                                                          | 0 ± 0.10                                                                                                                                                                    | 1 ± 0.30                      | 3 ± 1.10                      | 15 ± 0.26                     | 61 ± 1.39                      | 0.9514 |
| Human hepatic cancer cell line (HepG2)                                         |                                                                                                                                                                             |                               |                               |                               |                                |        |
| HCol40                                                                         | 40 ± 1.17                                                                                                                                                                   | 45 ± 0.58                     | 51 ± 0.75                     | 60 ± 0.91                     | 75 ± 1.70                      | 0.9961 |
| HCop40                                                                         | 7 ± 1.96                                                                                                                                                                    | 18 ± 0.95                     | 29 ± 0.80                     | 44 ± 1.06                     | 70 ± 1.67                      | 0.9956 |
| HCo40                                                                          | 0 ± 0.57                                                                                                                                                                    | 1 ± 0.45                      | 9 ± 0.72                      | 23 ± 0.61                     | 53 ± 1.11                      | 0.9995 |
| Human colon cancer cell line (Caco-2)                                          |                                                                                                                                                                             |                               |                               |                               |                                |        |
| CCol40                                                                         | 12 ± 0.61                                                                                                                                                                   | 23 ± 0.72                     | 33 ± 0.72                     | 47 ± 1.00                     | 69 ± 0.68                      | 0.9923 |
| CCop40                                                                         | 0 ± 0.11                                                                                                                                                                    | 5 ± 0.68                      | 13 ± 0.37                     | 23 ± 0.55                     | 40 ± 1.13                      | 0.9926 |
| CCo40                                                                          | 0 ± 0.10                                                                                                                                                                    | 3 ± 0.65                      | 19 ± 0.77                     | 41 ± 0.95                     | 77 ± 1.44                      | 0.9937 |
